# Supplementary material for: Fabrication of Ag3PO4–PAN composite nanofibers for photocatalytic applications
Source: Royal Society of Chemistry journal article supplement (doi:10.1039/c3ce00073g), 2013-01-01
Supplement: c3ce00073g.pdf [file c3ce00073g.pdf]

Supporting Information for

## Fabrication of $\text{Ag}_3\text{PO}_4/\text{PAN}$ composite nanofibers for photocatalytic applications

Hongchao Yu,<sup>a,b</sup> Zhengbo Jiao,<sup>a</sup> Hongyan Hu,<sup>a</sup> Gongxuan Lu,<sup>\*,a</sup> Jinhua Ye<sup>c</sup> and Yingpu Bi<sup>\*,a</sup>

<sup>a</sup> State Key Laboratory for Oxo Synthesis & Selective Oxidation, and National Engineering Research Center for Fine Petrochemical Intermediates, Lanzhou Institute of Chemical Physics, CAS, Lanzhou 730000, China.

<sup>b</sup> University of Chinese Academy of Sciences, Beijing 100049, China.

<sup>c</sup> International Center for Materials Nanoarchitectonics (MANA), and Research Unit for Environmental Remediation Materials, National Institute for Materials Science (NIMS), Tsukuba, 305-0047, Japan, and TU-NIMS Joint Research Center, School of Materials Science and Engineering, Tianjin University, 92 Weijjin Road, Nankai District, Tianjin, P. R. China.

\*To whom correspondence should be addressed.

Email: [yingpubi@licp.cas.cn](mailto:yingpubi@licp.cas.cn); [gxlu@lzb.ac.cn](mailto:gxlu@lzb.ac.cn)

### Experimental Section

#### 1. Materials

PAN ( $M_w=150000$ ) was purchased from J&K Scientific Ltd, and ACS grade DMF was purchased from Sinopharm Chemical ReagentCo. Ltd.  $\text{AgNO}_3$  and  $\text{NaH}_2\text{PO}_4$  were also purchased from Sinopharm Chemical ReagentCo. Ltd, which were used to prepare  $\text{Ag}_3\text{PO}_4$  nanoparticles.

#### 2. Synthesis of $\text{Ag}_3\text{PO}_4$ nanoparticles

The  $\text{Ag}_3\text{PO}_4$  nanoparticles were prepared by a simple precipitation reaction. In a typical synthesis,  $\text{AgNO}_3$  (0.2 g) was solved in aqueous solution. Ammonia aqueous solution (0.1 M) was added with drop by drop to the above solution to form a transparent solution. Then the massive  $\text{NaH}_2\text{PO}_4$  slowly dissolved in the solution of silver ammonia. After reaction for half an hour, the precursor  $\text{Ag}_3\text{PO}_4$  particles were isolated by centrifugation and dried.

#### 2. Fabrication of the $\text{Ag}_3\text{PO}_4/\text{PAN}$ nanofibers

In a typical process, the  $\text{Ag}_3\text{PO}_4/\text{PAN}$  composite nanofibers were prepared by dissolving 0.5 g polyacrylonitrile (PAN) in 4.5 g N,N-Dimethyl formamide (DMF) to get a PAN solution of 10 wt %, and then 0.5 g  $\text{Ag}_3\text{PO}_4$  particles was added to the as-prepared PAN/DMF solution to form a well-dispersed viscous solution after magnetically stirred for 30 min and then sonicated for 1 h. Subsequently, the mixture was loaded into a plastic syringe equipped with a metallic needle which was connected to a high-voltage generator that was capable of produce DC voltages from 0 to 50 kV. The liquids were fed at a constant rate of 1 mL/h through a syringe pumps. A sheet of grounded aluminum foil was placed 10 cm under the syringe as the collector. All experiments were conducted at room temperature and atmosphere pressure.

#### 3. Photocatalytic Reactions

In a typical test, the sample (0.4 g, the mass ratio of  $\text{Ag}_3\text{PO}_4$ : PAN was 5:5) was mixed with an aqueous solution of RhB dye (100 mL, 8 mg/L). The reaction system was irradiated with a 300 W Xe arc lamp equipped with an ultraviolet cutoff filter to provide visible light with  $\lambda \geq 420$  nm. The degradation of RhB dye was monitored by UV/Vis spectroscopy. Before the spectroscopy measurement, this photocatalyst was removed from the photocatalytic reaction systems by a dialyzer (Millipore, Millex-LH 0.45  $\mu\text{m}$ ).

#### 4. Characterizations

The morphologies were observed by a field-emission scanning electron microscope (FE-SEM, JSM 6701F) operated at an accelerating voltage of 5 kV. The X-ray diffraction (XRD) measurements were performed on a X'pert PRO diffractometer using Cu K $\alpha$  radiation (40 kV). The XRD patterns were recorded from 10° to 90° with a scanning rate of 0.067°/s. The TEM images and composition of the products were characterized on a transmission electron microscope (JEM-1200 EX). The infrared spectra were obtained on a TENSOR27 FT-IR spectrometer using the KBr disk method. UV/Vis absorption spectra were taken at room temperature on a UV-2550 (Shimadzu) spectrometer.

## Additional Figures and Discussions

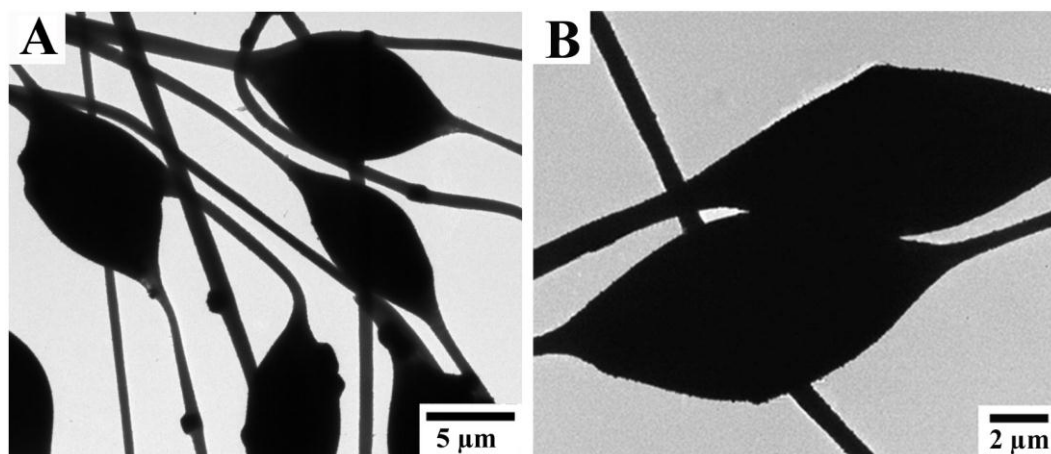

**Fig. S1.** TEM image of  $\text{Ag}_3\text{PO}_4/\text{PAN}$  composite nanofibers with different voltage: (A, B) 15 kV.  $\text{Ag}_3\text{PO}_4:\text{PAN}=5:5$ , work distance 10 cm.

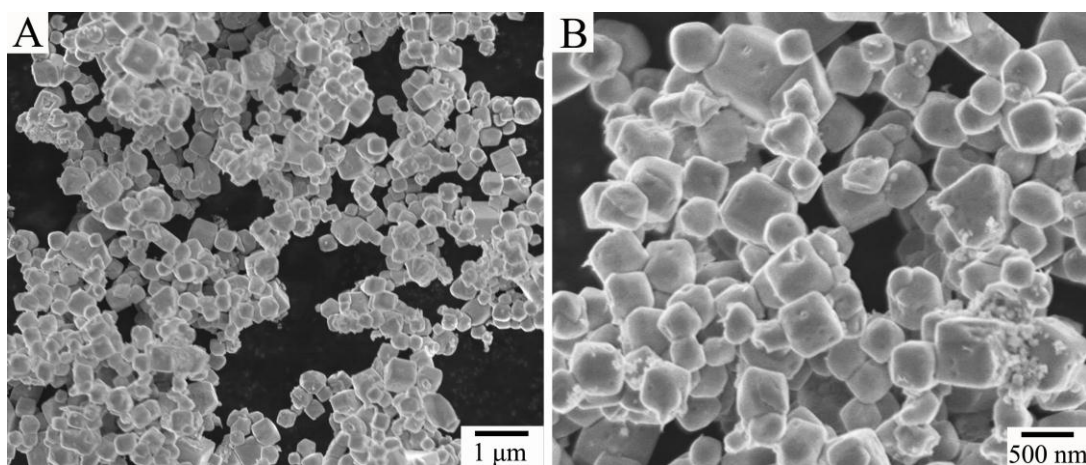

**Fig. S2.** SEM images of  $\text{Ag}_3\text{PO}_4$  particles synthesized by reacting the  $[\text{Ag}(\text{NH}_3)_2]^+$  complex with  $\text{Na}_2\text{HPO}_4$  at room temperature

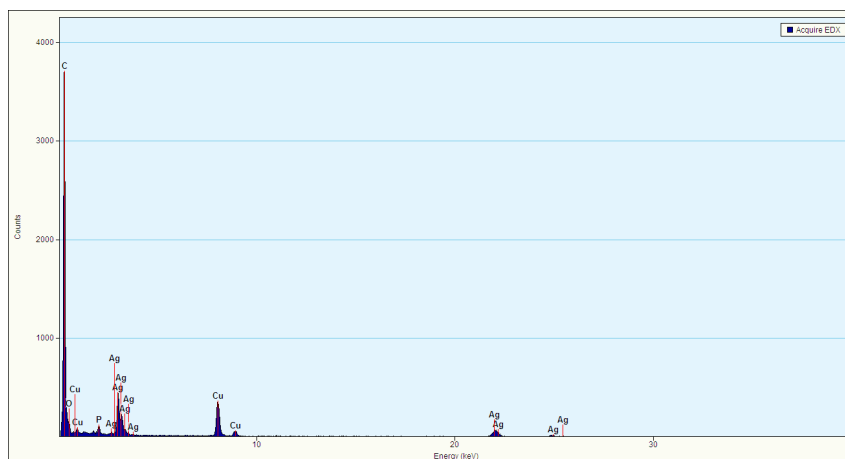

Fig. S3. EDS spectra of the as-synthesized  $\text{Ag}_3\text{PO}_4/\text{PAN}$  necklace-like nanofibers.

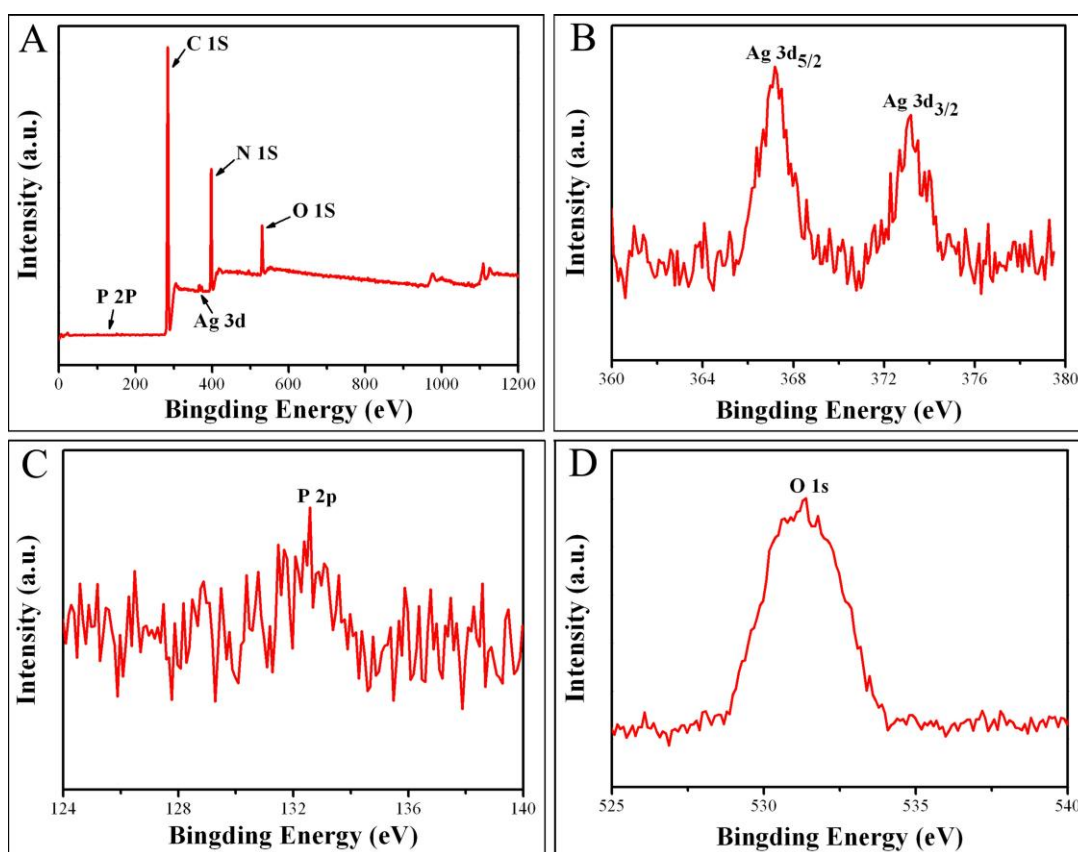

Fig. S4. XPS spectra of (A)  $\text{Ag}_3\text{PO}_4/\text{PAN}$  necklace-like nanofibers, (B) Ag 3d, (C) P 2p, (D) O 1s.

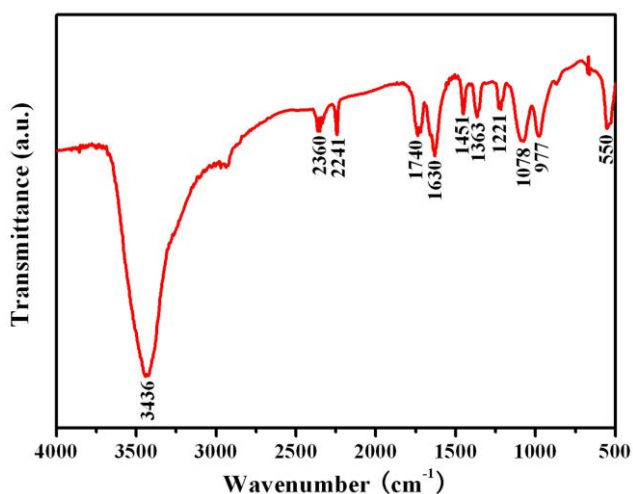

**Fig. S5.** FTIR spectra of Ag<sub>3</sub>PO<sub>4</sub>/PAN necklace-like nanofibers.

#### **FTIR analysis of the as-prepared Ag<sub>3</sub>PO<sub>4</sub>/PAN necklace-like nanofibers**

The infrared spectra of the Ag<sub>3</sub>PO<sub>4</sub>/PAN necklace-like nanofibers has been investigated and shown in Fig. S5. It can be clearly seen that the Ag<sub>3</sub>PO<sub>4</sub> displays the characteristic absorption peaks of the P-O stretching vibrations at 1078 cm<sup>-1</sup> and 550 cm<sup>-1</sup>, respectively [1]. The vibrations characteristic of CN nitrile group is observed at 2241 cm<sup>-1</sup>, and the characteristic bands at 1451 cm<sup>-1</sup>, 1363 cm<sup>-1</sup> and 1221 cm<sup>-1</sup> are assigned to the aliphatic CH group vibrations [2]. In addition, the bands at 3436 cm<sup>-1</sup> and 1630 cm<sup>-1</sup> are attributed to OH stretching vibrations of the H<sub>2</sub>O molecules, the peak at 2360 cm<sup>-1</sup> can be attributed to CO<sub>2</sub> peak presented in air. Besides, the C-C bands is appeared around 977cm<sup>-1</sup> [3], and the peak at 1740 cm<sup>-1</sup> should correspond to the C=O peak for methyl acrylate comonomer. [4]

#### **Reference**

- [1]. M. Thomas, S. K. Ghosh and K. C. George, *Mater. Lett.*, 2002, 56, 386.
- [2]. W. Zhang, J. Liu and G. Wu. *Carbon*, 2003, 41, 2805.
- [3]. S. Bloembergen, D. Holden, G. Hamer, T. Bluhm and R. Marchessault. *Macromolecules*, 1986, 19, 2865.
- [4]. S. Juthawan, J. Sujinda, N. Manit, M. Chidchanok and S. Pitt. *Polym. Int.*, 2006, 825.

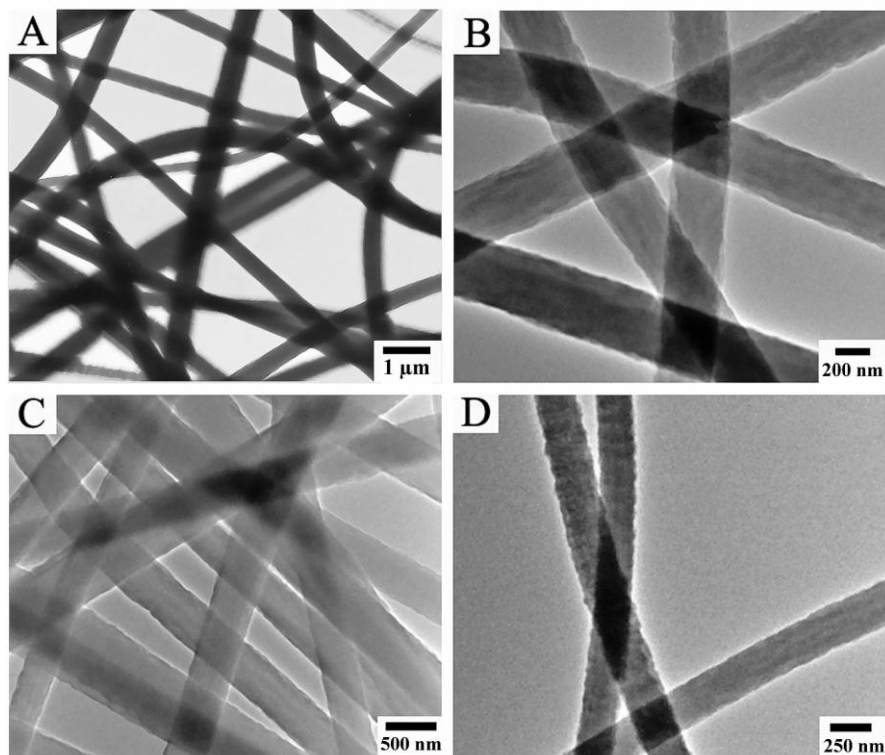

**Fig. S6.** TEM image of  $\text{Ag}_3\text{PO}_4/\text{PAN}$  composite nanofibers with different voltage: (A, B) 20 kV, (C) 25 kV, (D) 30 kV.  $\text{Ag}_3\text{PO}_4:\text{PAN}=5:5$ , work distance 10 cm.

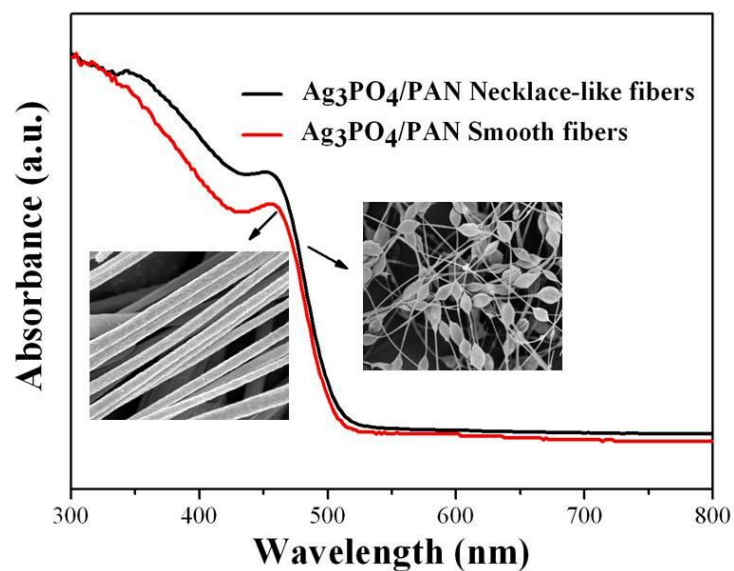

**Fig. S7.** The ultraviolet-visible diffusive absorption spectrums of  $\text{Ag}_3\text{PO}_4/\text{PAN}$  electrospun mats: the neck-lace like nanofibers and the smooth nanofibers



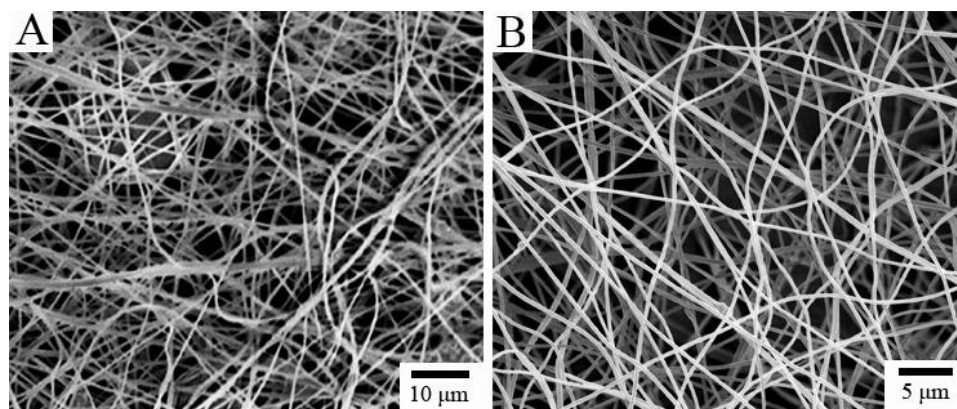

**Fig. S8.** SEM images of the  $\text{Ag}_3\text{PO}_4/\text{PAN}$  nanofibers with different magnifications. PAN 12 wt %, Voltage 15 kV, work distance 10 cm.

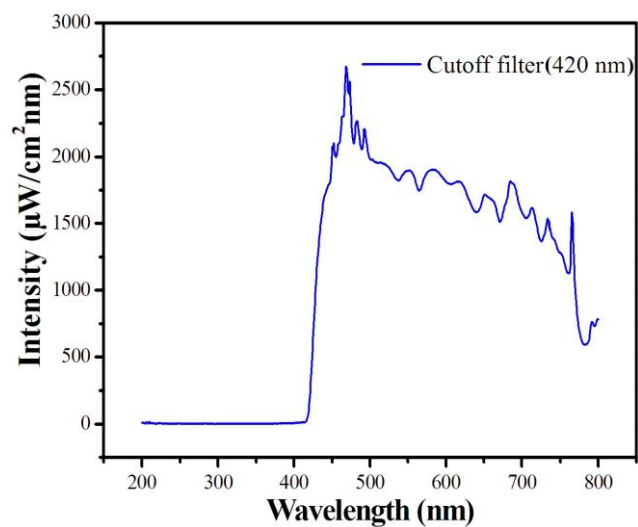

**Fig. S9.** The intensity and wavelength distribution of the irradiation light employed in the organic decomposition experiments. Integral intensities were measured under the actual experimental conditions.

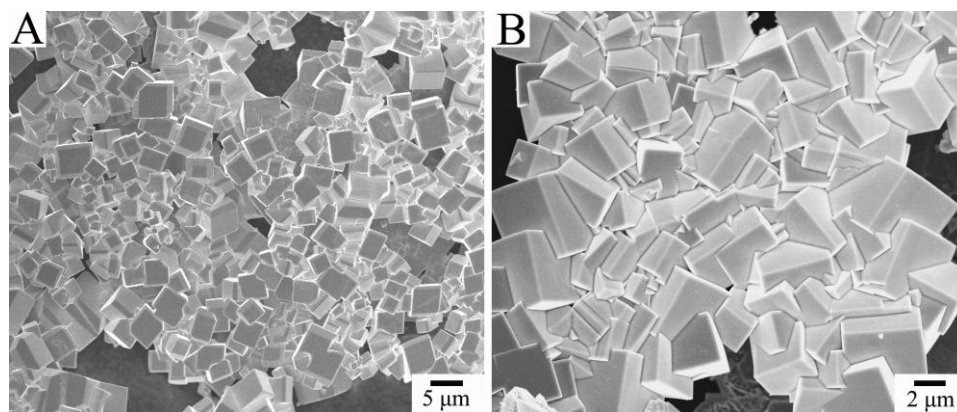

**Fig. S10.** (A,B) SEM images of the cubic  $\text{Ag}_3\text{PO}_4$  crystals with different magnifications.

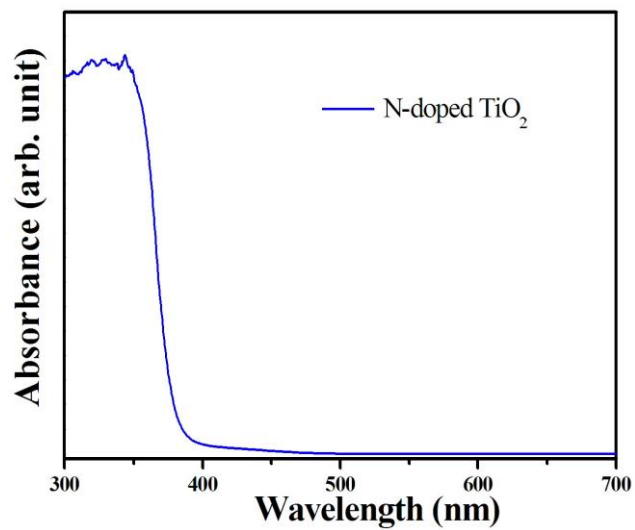

**Fig. S11.** The ultraviolet–visible diffuse reflectance spectrums of N-doped  $\text{TiO}_2$ .



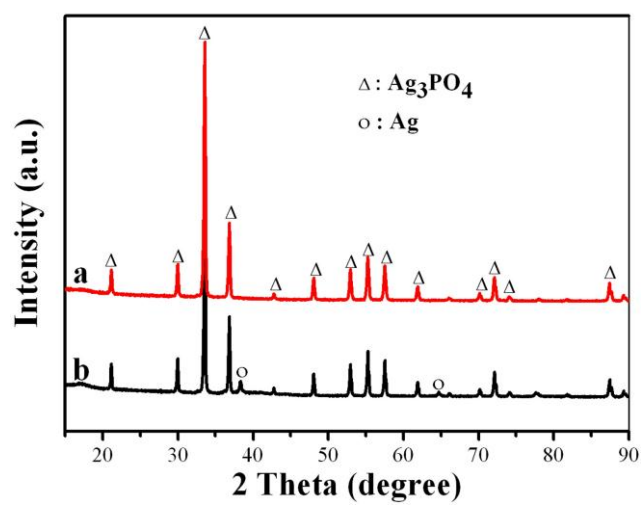

**Fig. S12.** XRD patterns of  $\text{Ag}_3\text{PO}_4$ /PAN Necklace-like nanofibers: (a) before the photodegradation experiment, (b) after the photodegradation experiment.
